# Supplementary material
Source: MDPI journal article supplement (https://www.mdpi.com/search?q=ijerph-17-09170)
Supplement: s001 [file ijerph-17-09170-s001.pdf]

**Table S1.** The result of comparing models used by CARBayesST.

| Model                 | Hip fracture       |        |         | Osteoporosis |        |         | Bone cancer |        |         |      |
|-----------------------|--------------------|--------|---------|--------------|--------|---------|-------------|--------|---------|------|
|                       | Time (s)           | DIC    | $p_D$ * | Time (s)     | DIC    | $p_D$ * | Time (s)    | DIC    | $p_D$ * |      |
| Model 1: CARanova     | 142.9              | 2118.5 | 171.8   | 147.1        | 3821.7 | 353.7   | 162.3       | 1029.3 | 29.4    |      |
| Model 2: CARlinear    | 132.2              | 2123.8 | 52.7    | 127.9        | 6163.7 | 65.3    | 141.1       | 1026.1 | 24.4    |      |
| Model 3: CARar        | 98.5               | 2102.4 | 151.6   | 102.8        | 3272.0 | 323.6   | 100.6       | 1011.2 | 42.3    |      |
| Model 4: CARadaptive  | 545.3              | 2007.7 | 74.2    | 478.9        | 2001.8 | 72.3    | 480.8       | 2004.9 | 72.0    |      |
| Model 5: CARlocalised | 389.9              | 2029.2 | 109.6   | 374.3        | 2029.3 | 108.8   | 388.2       | 2027.5 | 109.3   |      |
| R-INLA                | Type 1 interaction | 3.23   | 2100.1  | 159.7        | 2.76   | 3212.3  | 304.8       | 2.24   | 1021.7  | 21.9 |

We used the package called CARBayesST in R which is the first proprietary software package for spatio-temporal unit modeling with CAR prior (Lee et al., 2018). With the package, we based on Markov chain Monte Carlo (MCMC) to compare several models which applied the spatial temporal interaction and following models are selected; CARlinear CARanova, CARsepsatial, CARar, CARadaptive and CARlocalised.

**Table S2.** R-INLA coding.

```

> fom1_hfx = hfx_case ~ f(region, model='bym', graph=cheongju) +
  f(time, model="rw2") + f(time1, model="iid") +
  f(region.time, model="iid") +
  flo
> result1_hfx= inla(fom1_hfx, family="poisson", data=dat, E=dat$hfx_exp,
  control.compute=list(dic=TRUE, cpo=TRUE,
  graph=TRUE, mlk=TRUE) )
> fom2_hfx = hfx_case ~ f(region, model='bym', graph=cheongju) +
  f(time, model="rw2") + f(time1, model="iid") +
  f(region.int, model="iid", group=time.int,
  control.group=list(model="rw2")) +
  flo
> fom3_hfx = hfx_case ~ f(region, model='bym', graph=cheongju) +
  f(time, model="rw2") + f(time1, model="iid") +
  f(time.int, model="iid", group=region.int,
  control.group=list(model="besag", graph=cheongju)) +
  flo
> fom4_hfx = hfx_case ~ f(region, model='bym', graph=cheongju) +
  f(time, model="rw2") + f(time1, model="iid") +
  f(region.int, model="besag", graph=cheongju,
  group=time.int, control.group=list(model="rw2")) + flo

```

These R codes are for fitting each type of formula with hip fracture. We did not include other selected diseases (osteoporosis, bone cancer) because it also performed in the same way.

**Table S3.** R-CARBayesST coding.

```

> m1_hfx = CARBayesST::ST.CARanova(f_hfx, data=dat, w=w.mat, family="poisson",
  interaction=F, burnin=5000, n.sample=20000, thin=5)
> m2_hfx = CARBayesST::ST.CARlinear(f_hfx, data=dat, w=w.mat, family="poisson",
  burnin=5000, n.sample=20000, thin=5)
> m3_hfx = CARBayesST::ST.CARar(f_hfx, data=dat, w=w.mat, family="poisson",
  burnin=5000, n.sample=20000, thin=5)
> m4_hfx = CARBayesST::ST.CARadaptive(f_hfx, data=dat, w=w.mat, family="poisson",
  burnin=5000, n.sample=20000, thin=5)
> m5_hfx = CARBayesST::ST.CARlocalised(f_hfx, data=dat, w=w.mat, family="poisson",
  G=3, burnin=5000, n.sample=20000, thin=5)

```

These R codes are for fitting each type of formula with hip fracture. We did not include other selected diseases (osteoporosis, bone cancer) because it also performed in the same way.
